# Supplementary material for: Effects of carbon on the structure and electrochemical performance of Li2FeSiO4 cathode materials for lithium-ion batteries
Source: Royal Society of Chemistry journal article supplement (doi:10.1039/c2ra20552a), 2012-01-01
Supplement: c2ra20552a.pdf [file c2ra20552a.pdf]

## Supporting Information

### Effects of Carbon on Structure and Electrochemical Performance of $\text{Li}_2\text{FeSiO}_4$ Cathode Materials for Lithium-ion Batteries

Pengjian Zuo, Tao Wang, Guangyu Cheng, Xinqun Cheng, Chunyu Du and Geping Yin

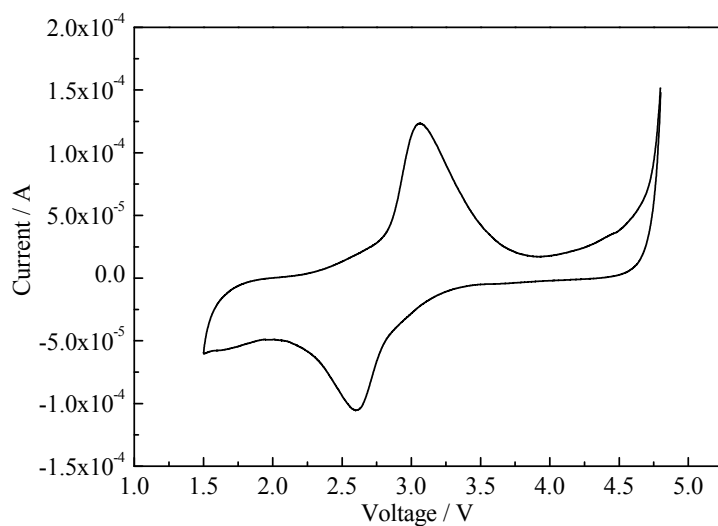

**Figure S1.** CV curve of  $\text{Li}_2\text{FeSiO}_4/\text{C}$  materials with 7.5wt % carbon

Cyclic voltammetry was performed with a scanning rate of  $0.2 \text{ mV}\cdot\text{s}^{-1}$ . Figure S1 shows the second CV curve of  $\text{Li}_2\text{FeSiO}_4/\text{C}$  material with 7.5wt% carbon. The result shows that the oxidation and reduction peak potentials are located at about 3.1 and 2.6 V versus  $\text{Li}^+/\text{Li}$ , respectively, which corresponds to the oxidation-reduction reaction of  $\text{Fe}^{3+}/\text{Fe}^{2+}$  redox couple.
